# Supplementary material for: Multiple heteroatom induced carrier engineering and hierarchical nanostructures for high thermoelectric performance of polycrystalline In4Se2.5
Source: Royal Society of Chemistry journal article supplement (doi:10.1039/c4ta05508j), 2014-11-03
Supplement: c4ta05508j1.pdf [file c4ta05508j1.pdf]

## Electronic Supplemently Information

# Multiple Heteroatoms Induced Carrier Engineering and Hierarchical Nanostructure for High Thermoelectric Performance of Polycrystalline $\text{In}_4\text{Se}_{2.5}$

Yubo Luo, Junyou Yang\*, Ming Liu, Ye Xiao, Liangwei Fu, Weixin Li, Dan Zhang, Mingyang Zhang, Yudong Cheng

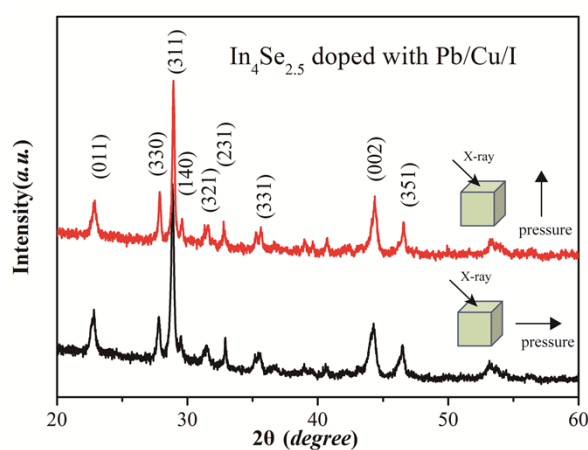

**Figure S1:** XRD patterns of the sintered samples ( $M=\text{Pb}+\text{Cu}+\text{I}$ ) from sections parallel and perpendicular to the pressing direction.

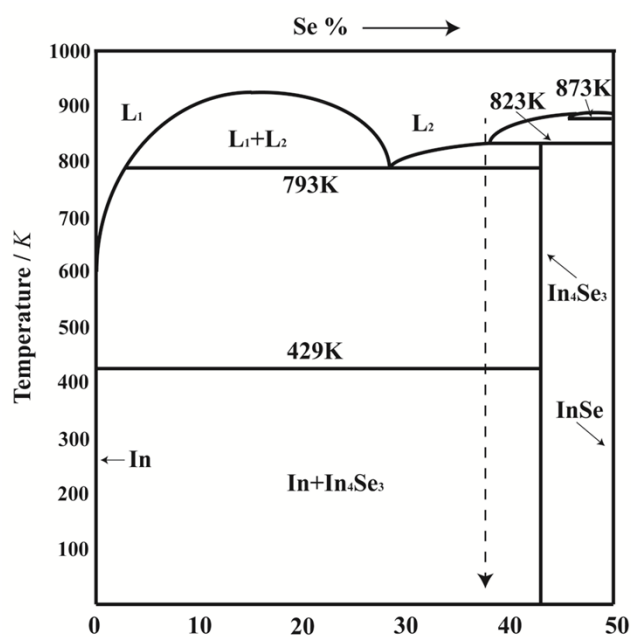

**Figure S2:** The In-Se binary phase diagram

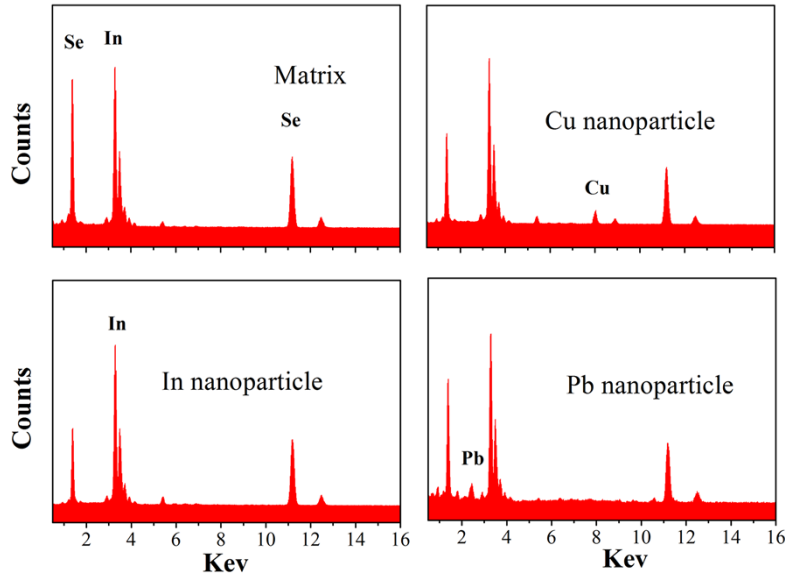

**Figure S3:** the EDS results for Matrix, Cu, Pb and In nanoparticles

**SI4:** the calculation of Lorenz number of all the samples

The Lorenz number (L) is estimated by the follow equation:

$$L = \left( \frac{k_B}{e} \right)^2 \left( \frac{(r + 7/2)F_{r+5/2}(\varphi)}{(r + 3/2)F_{r+1/2}(\varphi)} - \left( \frac{(r + 7/2)F_{r+3/2}(\varphi)}{(r + 3/2)F_{r+1/2}(\varphi)} \right)^2 \right)$$

Here,  $F_n(\varphi)$  is the Fermi integration:  $F_n(\varphi) = \int_0^{\infty} \frac{x^n}{1 + e^{x-\varphi}} dx$ ,  $r$  is the scattering parameter (

typical  $r = -1/2$  for acoustic phonon scattering near room temperature) and  $\varphi$  is the

reduced Fermi energy  $\varphi = E_F / k_B T$  and which can be derived from the measured  $S$

on the basis of single band approximation:

$$S = \pm \frac{k_B}{e} \left( \frac{(r + 5/2)F_{r+3/2}(\varphi)}{(r + 3/2)F_{r+1/2}(\varphi)} - \varphi \right)$$

Finally, the calculated L for  $\text{In}_4\text{Se}_{2.5}$ , Pb, Pb/I, Pb/Cu, Cu/I and Pb/Cu/I doped samples

are  $1.57 \times 10^{-8} \text{ W}\Omega\text{K}^{-2}$ ,  $1.81 \times 10^{-8} \text{ W}\Omega\text{K}^{-2}$ ,  $1.77 \times 10^{-8} \text{ W}\Omega\text{K}^{-2}$ ,  $1.68 \times 10^{-8} \text{ W}\Omega\text{K}^{-2}$ ,

$1.66 \times 10^{-8} \text{ W}\Omega\text{K}^{-2}$  and  $1.67 \times 10^{-8} \text{ W}\Omega\text{K}^{-2}$ , respectively.

**SI Table 1:** Parameters used to calculate the lattice thermal conductivity

| <b>Parameters</b>          |                                    |
|----------------------------|------------------------------------|
| <b>Lattice constant</b>    | a=12.308Å<br>b=15.296Å<br>C=4.081Å |
| <b>Volume per atom</b>     | $26.37 \times 10^{-30} \text{m}^3$ |
| <b>Mass per atom</b>       | $1.65 \times 10^{-22} \text{g}$    |
| <b>Gruneisen parameter</b> | $\gamma=1.82$                      |
| <b>Sound velocity</b>      | 2045m/s                            |
| <b>Debye temperature</b>   | 260K                               |
| <b>Density of mass</b>     | 6.02g/m <sup>3</sup>               |
